# Supplementary material for: Increased coagulation activity and genetic polymorphisms in the F5, F10 and EPCR genes are associated with breast cancer: a case-control study
Source: PubMed Central journal article supplement (PMC4251949; doi:10.1186/1471-2407-14-845), 2014-11-19
Supplement: 12885_2014_5043_MOESM4_ESM.pdf [file 12885_2014_5043_MOESM4_ESM.pdf]

## Plasma levels of hemostatic parameters in cases and controls.

Median values with IQR shown in brackets.

|                                | Cases (n=366) | Controls (n=273) |                       |
|--------------------------------|---------------|------------------|-----------------------|
|                                | Median (IQR)  | Median (IQR)     | <i>P</i> -value       |
| <b>Coagulation activity:</b>   |               |                  |                       |
| <i>CAT-assay variables:</i>    |               |                  |                       |
| ETP (%)                        | 94.9 (19.8)   | 94.1 (19.1)      | n.s                   |
| Lag time (%)                   | 98.6 (21.4)   | 100.0 (16.5)     | 2.9*10 <sup>-17</sup> |
| Peak (%)                       | 98.4 (17.9)   | 86.7 (15.4)      | 3.3*10 <sup>-26</sup> |
| ttPeak (%)                     | 93.8 (12.8)   | 107.9 (15.5)     | 7.1*10 <sup>-36</sup> |
| APC resistance (nAPC-sr)       |               |                  |                       |
| <i>FV Leiden non-carriers</i>  | 0.75 (0.81)   | 0.39 (0.35)      | 2.2*10 <sup>-19</sup> |
| <i>FV Leiden carriers</i>      | 3.73 (1.02)   | 2.20 (1.12)      | 6.6*10 <sup>-5</sup>  |
| D-dimer (ng/mL)                | 300.0 (189.3) | 275.5 (146.9)    | 0.015                 |
| <b>Coagulation inhibitors:</b> |               |                  |                       |
| AT (%)                         | 101.5 (16.9)  | 107.7 (11.7)     | 3.3*10 <sup>-11</sup> |
| Protein C (%)                  | 109.4 (31.1)  | 101.9 (23.5)     | 0.002                 |
| Protein S (%)                  | 93.9 (20.8)   | 87.6 (21.2)      | 3.6*10 <sup>-6</sup>  |
| Free TFPI (ng/mL)              | 10.1 (4.8)    | 10.6 (4.1)       | n.s                   |

Peak= peak thrombin

ttPeak= time to peak thrombin

nAPC-sr= normalised APC sensitivity ratio

AT= antithrombin

(%) describes activity as compared to PNP

IQR; interquartile range (75<sup>th</sup> percentile-25<sup>th</sup> percentile)
